# Supplementary material
Source: PubMed Central journal article supplement (PMC8259471)
Supplement: CJN.15911020SupplementaryData.pdf [file CJN.15911020SupplementaryData.pdf]

### **Supplemental Material Table of Contents**

|        |                                                                                             |
|--------|---------------------------------------------------------------------------------------------|
| Page 1 | Supplemental Table 1. Types of Medication Errors Compared Between Treatment Arms.           |
| Page 2 | Supplemental Table 2. Severity of Medication Errors Compared Between Treatment Arms.        |
| Page 3 | Supplemental Table 3. Rates of Adverse Events by Severity, Compared Between Treatment Arms. |
| Page 4 | Supplemental Table 4. Types of Adverse Events Compared Between Treatment Arms.              |

**Supplemental Table 1.** Types of Medication Errors Compared Between Treatment Arms.

| <b>Medication Error</b>                            | <b>Control</b> | <b>Intervention</b> |
|----------------------------------------------------|----------------|---------------------|
| <b>Administrative</b>                              |                |                     |
| Drug omitted on EMR                                | 333            | 170                 |
| Additional drug on EMR                             | 521            | 163                 |
| Dose error                                         | 74             | 34                  |
| Wrong drug                                         | 12             | 10                  |
| Dosage instructions incomplete on EMR              | 52             | 18                  |
| Drug prescribed but patient not taking             | 47             | 26                  |
| Prescribing error                                  | 264            | 130                 |
| <b>Clinical</b>                                    |                |                     |
| Duplicate therapy                                  | 1              | 0                   |
| No indication for drug                             | 0              | 0                   |
| Untreated condition                                | 54             | 45                  |
| Dose too low                                       | 24             | 17                  |
| Dose too high                                      | 3              | 1                   |
| Drug contraindicated for medical reason or allergy | 0              | 0                   |
| Drug contraindicated due to drug interaction       | 0              | 0                   |
| Other                                              | 0              | 0                   |

**Supplemental Table 2.** Severity of Medication Errors Compared Between Treatment Arms.

| <b>Overhage Severity</b> | <b>Control</b> | <b>Intervention</b> |
|--------------------------|----------------|---------------------|
| (A) Potentially lethal   | 0              | 0                   |
| (B) Serious              | 1              | 0                   |
| (C) Significant          | 1320           | 586                 |
| (D) Minor                | 64             | 28                  |
| (E) No error             | 0              | 0                   |

**Supplemental Table 3.** Rates of Adverse Events by Severity, Compared Between Treatment Arms.

| CTCAE AE Grades          | Rate of Events Per Patient Year |                    | p-Value       |
|--------------------------|---------------------------------|--------------------|---------------|
|                          | Control                         | Intervention       |               |
| Overall                  | 21.26 (25.24)                   | 20.68 (18.35)      | 0.8253        |
| Grade 1                  | 14.00 (15.10)                   | 13.96 (1.47)       | 0.9616        |
| Grade 2                  | 5.28 (0.94)                     | 5.53 (0.72)        | 0.9349        |
| Grade 3                  | 1.57 (0.34)                     | 1.10 (0.22)        | 0.1854        |
| Grade 4                  | 0.38 (0.15)                     | 0.07 (0.05)        | <0.0001       |
| Grade 5                  | 0.01 (0.01)                     | 0 (0)              | 1.000         |
| <b>Grade 3 or Higher</b> | <b>1.97 (0.46)</b>              | <b>1.18 (0.25)</b> | <b>0.0475</b> |

**Supplemental Table 4.** Types of Adverse Events Compared Between Treatment Arms.

| <b>Adverse Event</b>                             | <b>Control</b> | <b>Intervention</b> |
|--------------------------------------------------|----------------|---------------------|
| Cardiovascular                                   | 149 (22.6%)    | 146 (23.9%)         |
| Metabolism and nutrition disorders               | 134 (20.3%)    | 127 (20.8%)         |
| Kidney                                           | 107 (16.2%)    | 101 (16.5%)         |
| Endocrine disorders                              | 64 (9.7%)      | 56 (9.1%)           |
| Gastrointestinal disorders                       | 58 (8.8%)      | 59 (9.6%)           |
| Immune system disorders                          | 47 (7.1%)      | 35 (5.7%)           |
| Nervous system disorders                         | 41 (6.2%)      | 38 (6.2%)           |
| Respiratory, thoracic, and mediastinal disorders | 17 (2.5%)      | 16 (2.6%)           |
| Pain                                             | 20 (3.0%)      | 11 (1.8%)           |
| Musculoskeletal and connective tissue disorders  | 11 (1.6%)      | 5 (0.8%)            |
| Psychiatric disorders                            | 6 (0.9%)       | 9 (1.4%)            |
| Skin and subcutaneous tissue disorders           | 4 (0.6%)       | 1 (0.1%)            |
| Ear, nose, throat                                | 1 (0.1%)       | 3 (4.9%)            |
| Other                                            | 0 (0.0%)       | 2 (0.3%)            |
| <b>Total</b>                                     | <b>659</b>     | <b>609</b>          |
